# Supplementary material for: Identification of rare X-linked neuroligin variants by massively parallel sequencing in males with autism spectrum disorder
Source: PubMed Central journal article supplement (PMC3492087; doi:10.1186/2040-2392-3-8), 2012-09-28

A

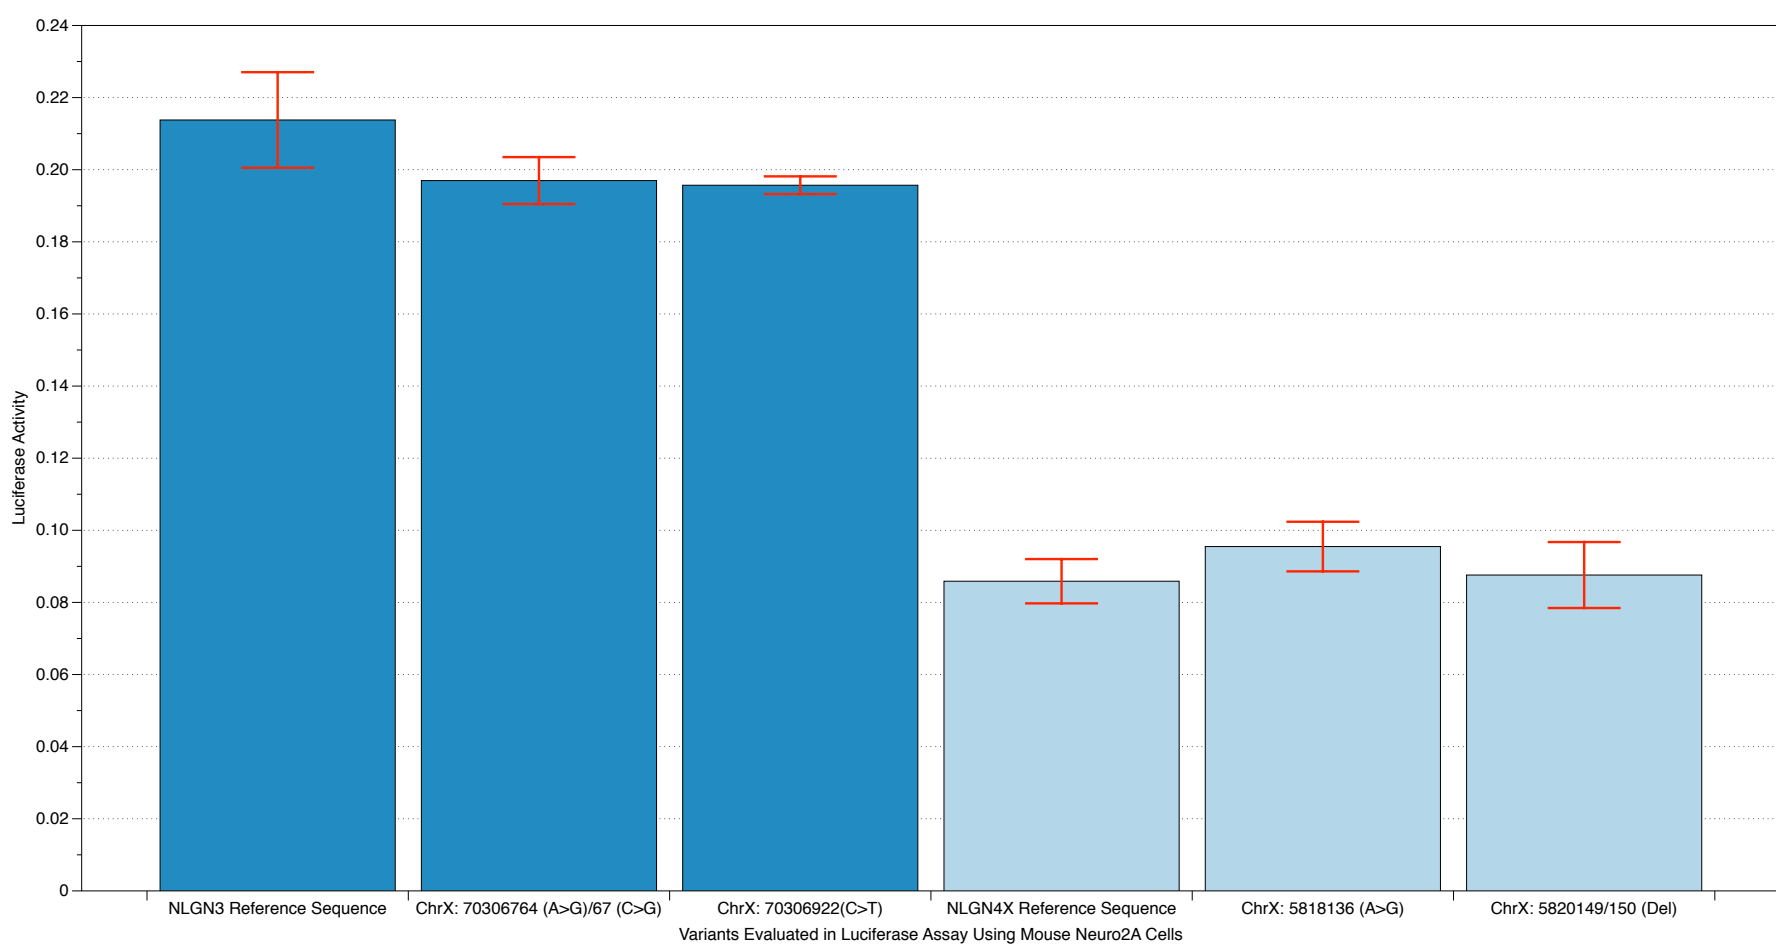

B

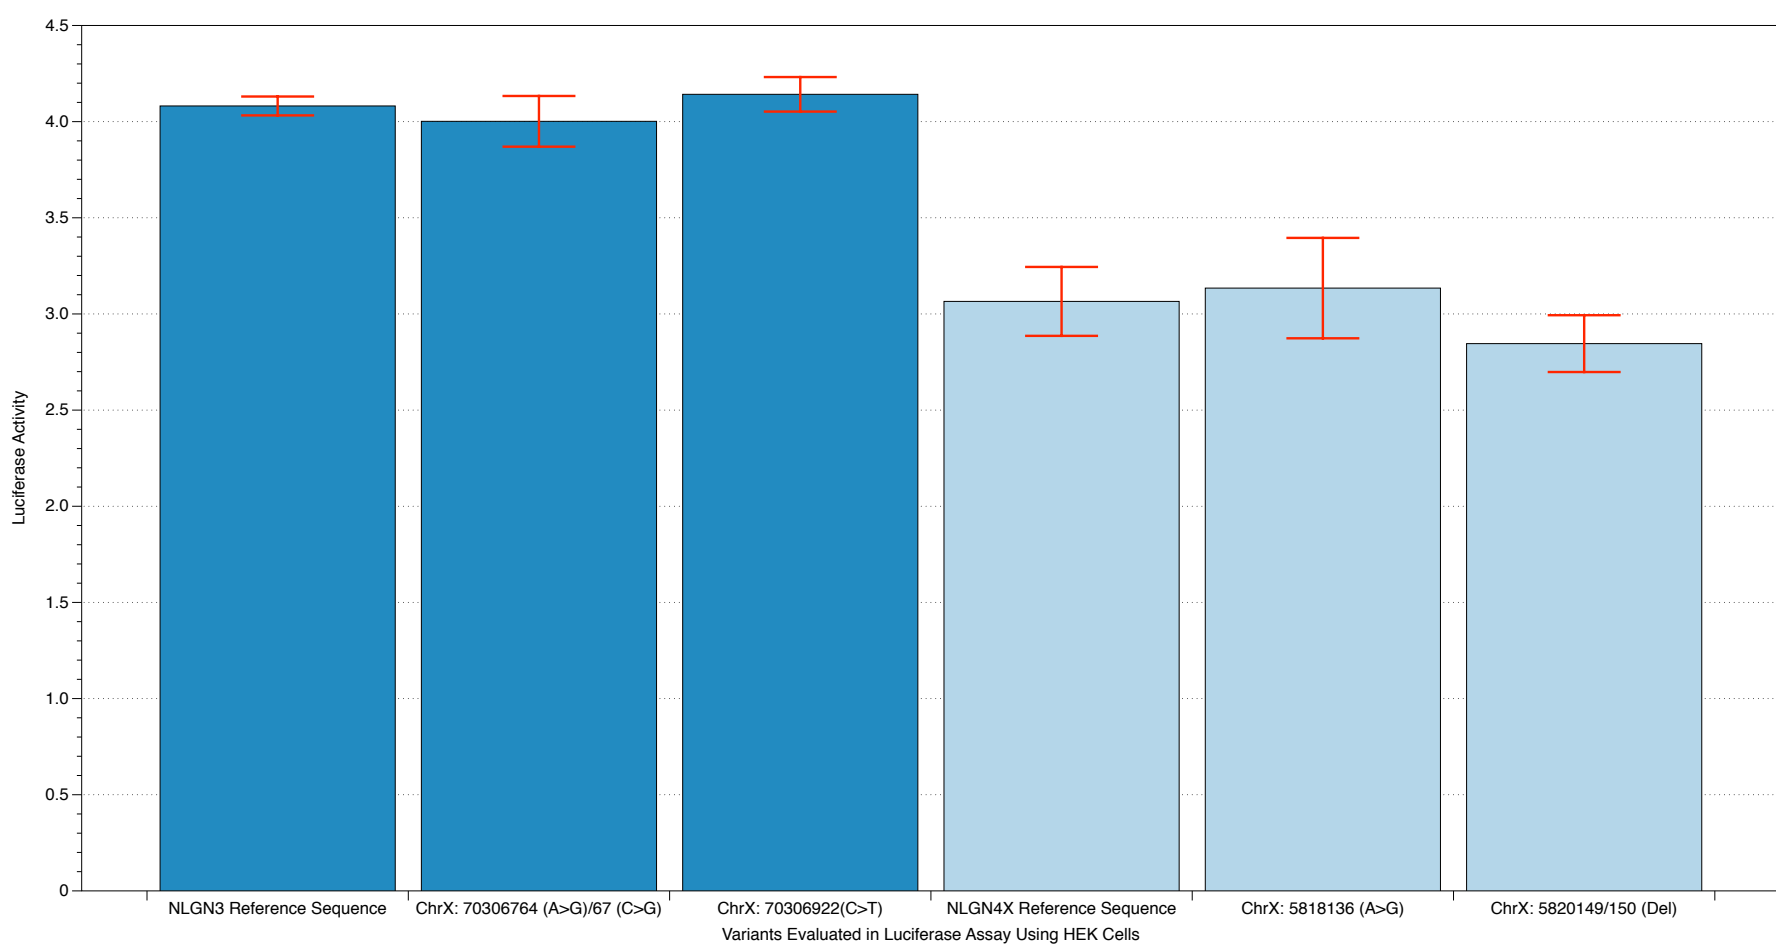

Supplement: 2040-2392-3-8-S8.pdf [file 2040-2392-3-8-S8.pdf]
